# Supplementary material
Source: PubMed Central journal article supplement (PMC7661089)
Supplement: 20-00317.pdf [file 20-00317.pdf]

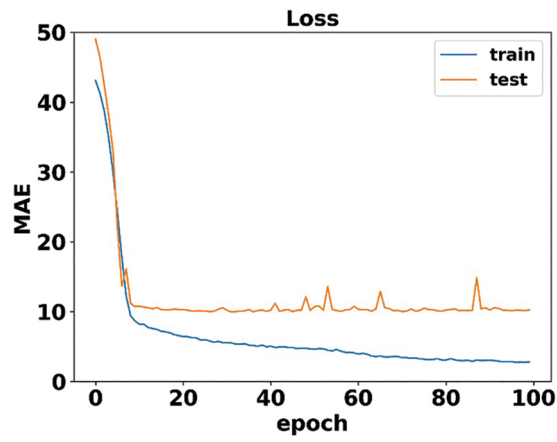

**ON-LINE FIGURE.** Loss (MAE) as a function of the epoch number for both training and testing from the cross-validation study. Note here  $n=32$  for training dataset and  $n=8$  for testing datasets, and this is 1 of the 5 runs from cross-validation (the other 4 runs yielded a very similar trend of loss curve). Admittedly overfitting exists likely due to the small sample size of the training dataset. This can be addressed further with the larger dataset and/or data augmentation.
